# Supplementary material
Source: publisher figshare collection journal article supplement (https://frontiersin.figshare.com/ndownloader/files/26140403)
Supplement: Supplementary file [file 26140403]

## Supplementary Material

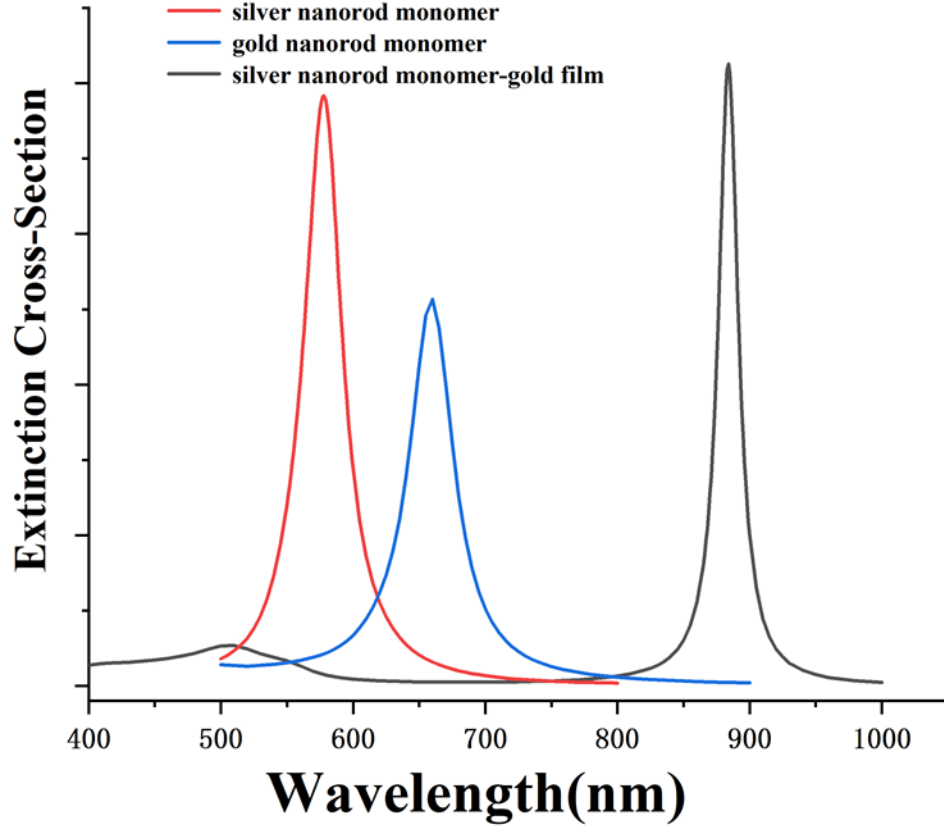

Figure 1:  $A_r = 3.5$ , normalized extinction spectra of silver nanorod monomer, gold nanorod monomer and silver nanorod monomer gold film.

Table2: In the nanostructures with different aspect ratios  $A_r = 2.5-4.0$ , the deviation rate of equation 7 and 8 was calculated using the actual simulation wavelength as the reference line.

| $A_r$ | (7)/ deviation rate | (8)/ deviation rate | Simulation( $\lambda$ ) |
|-------|---------------------|---------------------|-------------------------|
| 2.5   | 675.905/-2.0%       | 689.315/-0.1%       | 690                     |
| 3.0   | 778.01/-1.1%        | 789.07/0.2%         | 787                     |
| 3.5   | 880.11/-0.4%        | 888.825/0.5%        | 884                     |
| 4.0   | 982.22/-0.7%        | 988.58/0            | 989                     |

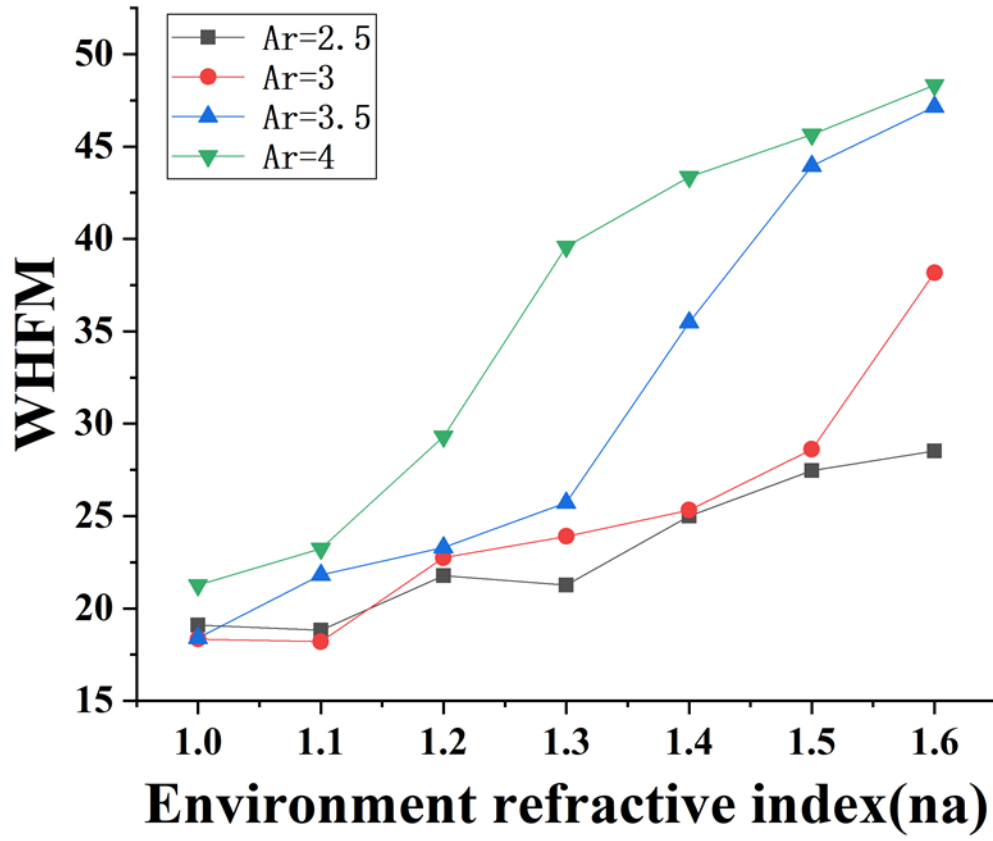

Figure 3 the full width at half maximum (FWHM) of AgNR-film structure with different  $A_r$  values in different surrounding refractive indices ( $n_a$ ).

Table4: Spectral information of silver nanorod-gold film structures with different thickness of spacer layers in air

| Group | $A_r$ | Gap<br>refractive<br>index( $n_b$ ) | Gap<br>distance(nm) | $\lambda$<br>( nm ) | $\Delta\lambda$ (nm) |
|-------|-------|-------------------------------------|---------------------|---------------------|----------------------|
| A-1   | 3.5   | 1                                   | 1.0                 | 959                 | -                    |
| A-2   | 3.5   | 1                                   | 1.5                 | 883                 | 76                   |
| A-3   | 3.5   | 1                                   | 2.0                 | 841                 | 42                   |
| A-4   | 3.5   | 1                                   | 2.5                 | 806                 | 35                   |
| A-5   | 3.5   | 1                                   | 3.0                 | 783                 | 23                   |
| A-6   | 3.5   | 1                                   | 3.5                 | 762                 | 21                   |
| A-7   | 3.5   | 1                                   | 3.8                 | 753                 | 9                    |
| A-8   | 3.5   | 1                                   | 4.0                 | 746                 | 7                    |
| B-1   | 3.5   | 1.58                                | 4.0                 | 884                 | -                    |
| B-2   | 3.5   | 1.58                                | 8.0                 | 794                 | 90                   |
| B-3   | 3.5   | 1.58                                | 12.0                | 753                 | 41                   |
| B-4   | 3.5   | 1.58                                | 16.0                | 730                 | 23                   |
| B-5   | 3.5   | 1.58                                | 20.0                | 716                 | 14                   |
| B-6   | 3.5   | 1.58                                | 24.0                | 706                 | 10                   |

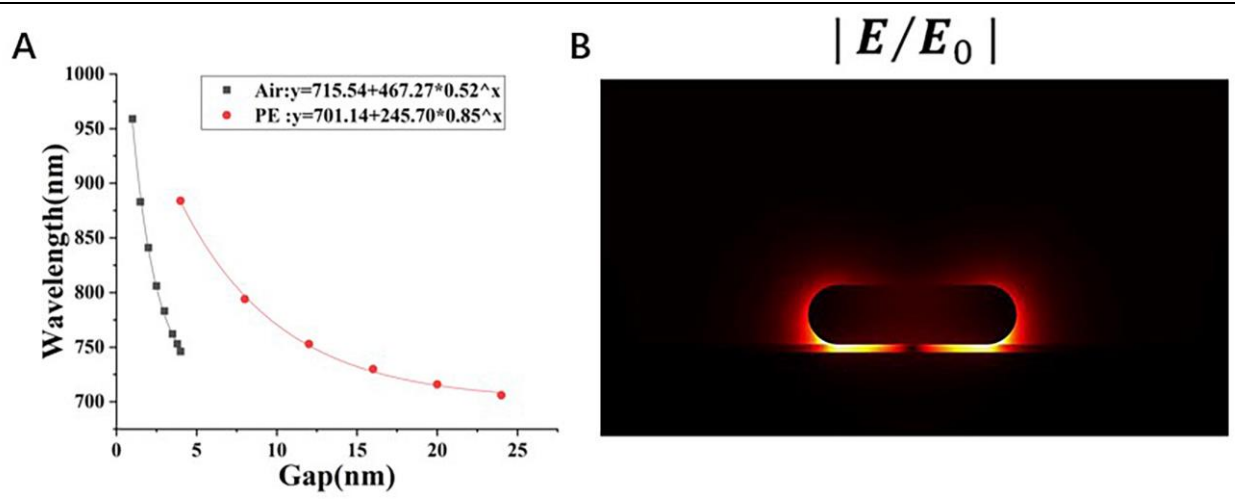

Figure 5: **(A)** The fitting functions of the relationship between the extinction cross-section peak position ( $\lambda$ ) and Air gap distance/PE thickness; **(B)** Horizontal coupling longitudinal mode, HLM.

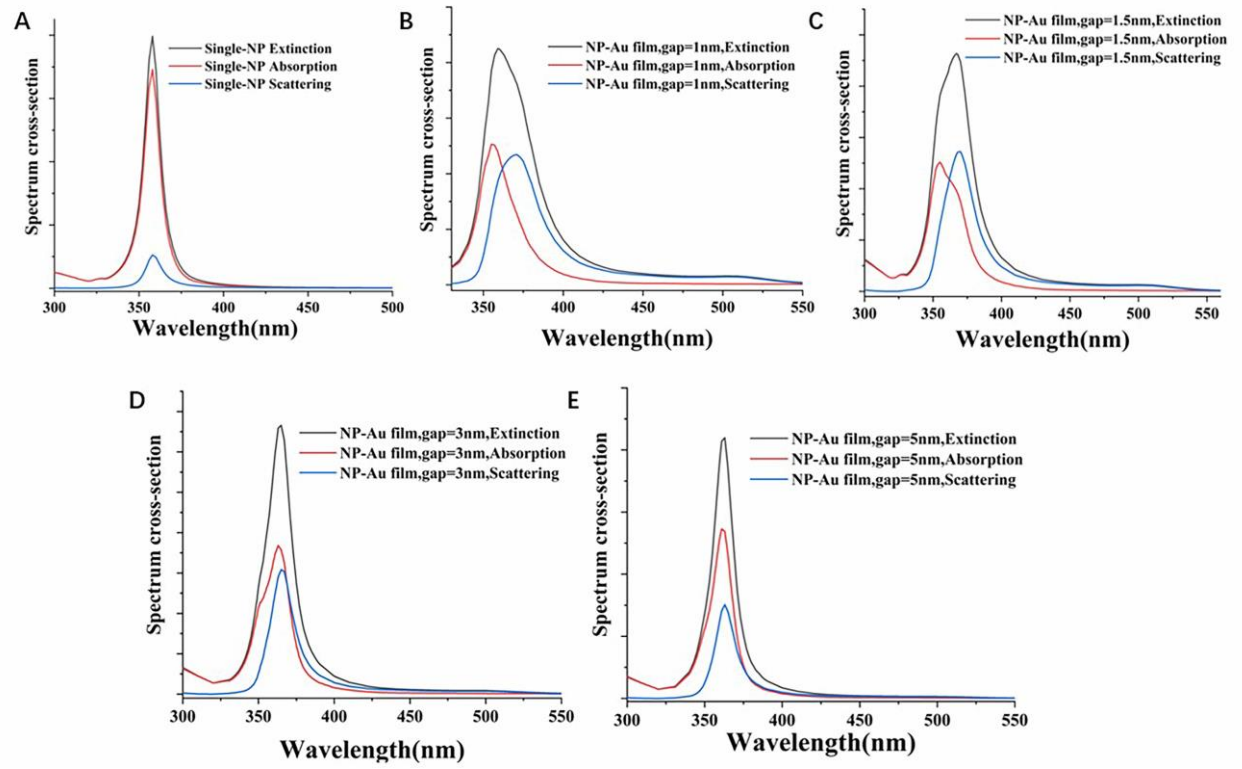

Figure 6: **(A)** The spectrum cross-section of a single nanosphere(Signal-NP); **(B), (C), (D)** and **(E)** are the spectrum cross-sections of the nanosphere(NP) suspended at 1nm, 1.5nm, 3nm and 5nm above the gold film.
